# Supplementary material for: Swallow-tailed perylene derivative: a new tool for fluorescent imaging of lipid hydroperoxides
Source: Royal Society of Chemistry journal article supplement (doi:10.1039/b713223a), 2007-01-01
Supplement: b713223a.pdf [file b713223a.pdf]

### Supporting Information

## Swallow-tailed perylene derivative: a new tool for fluorescent imaging of lipid hydroperoxides

Nobuaki Soh,\* Tomoyuki Ariyoshi, Tuyoshi Fukaminato, Hizuru Nakajima, Koji Nakano, Toshihiko Imato\*

*Department of Applied Chemistry, Graduate School of Engineering, Kyushu University, 744, Moto-oka, Nishi-ku, Fukuoka 819-0395, Japan*

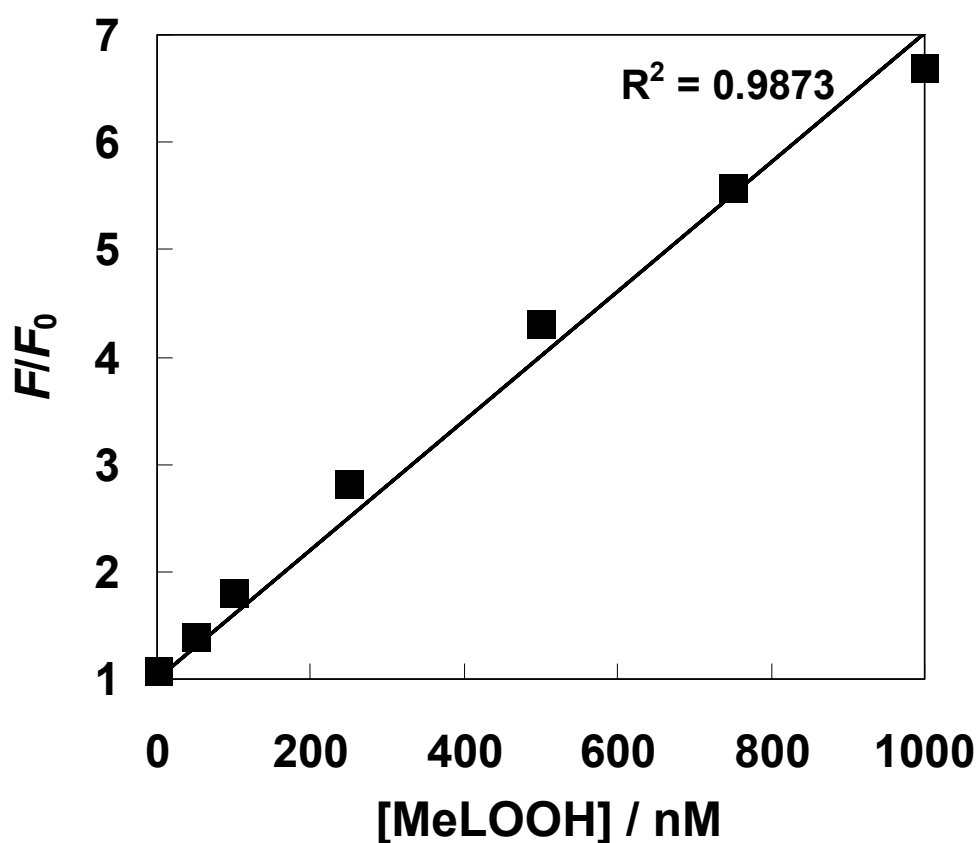

**Fig. S1** Relationship between the ratio of the fluorescence intensity of Spy-LHP and the concentration of MeLOOH. The fluorescence intensity was measured 5 min after the addition of MeLOOH (50, 100, 250, 500, 750, 1000 nM) to the Spy-LHP (1  $\mu$ M) under aerobic conditions with excitation at 465 nm at 37 °C in ethanol.  $F_0$  and  $F$  denote the fluorescence intensity at 535 nm before and after the addition of MeLOOH, respectively

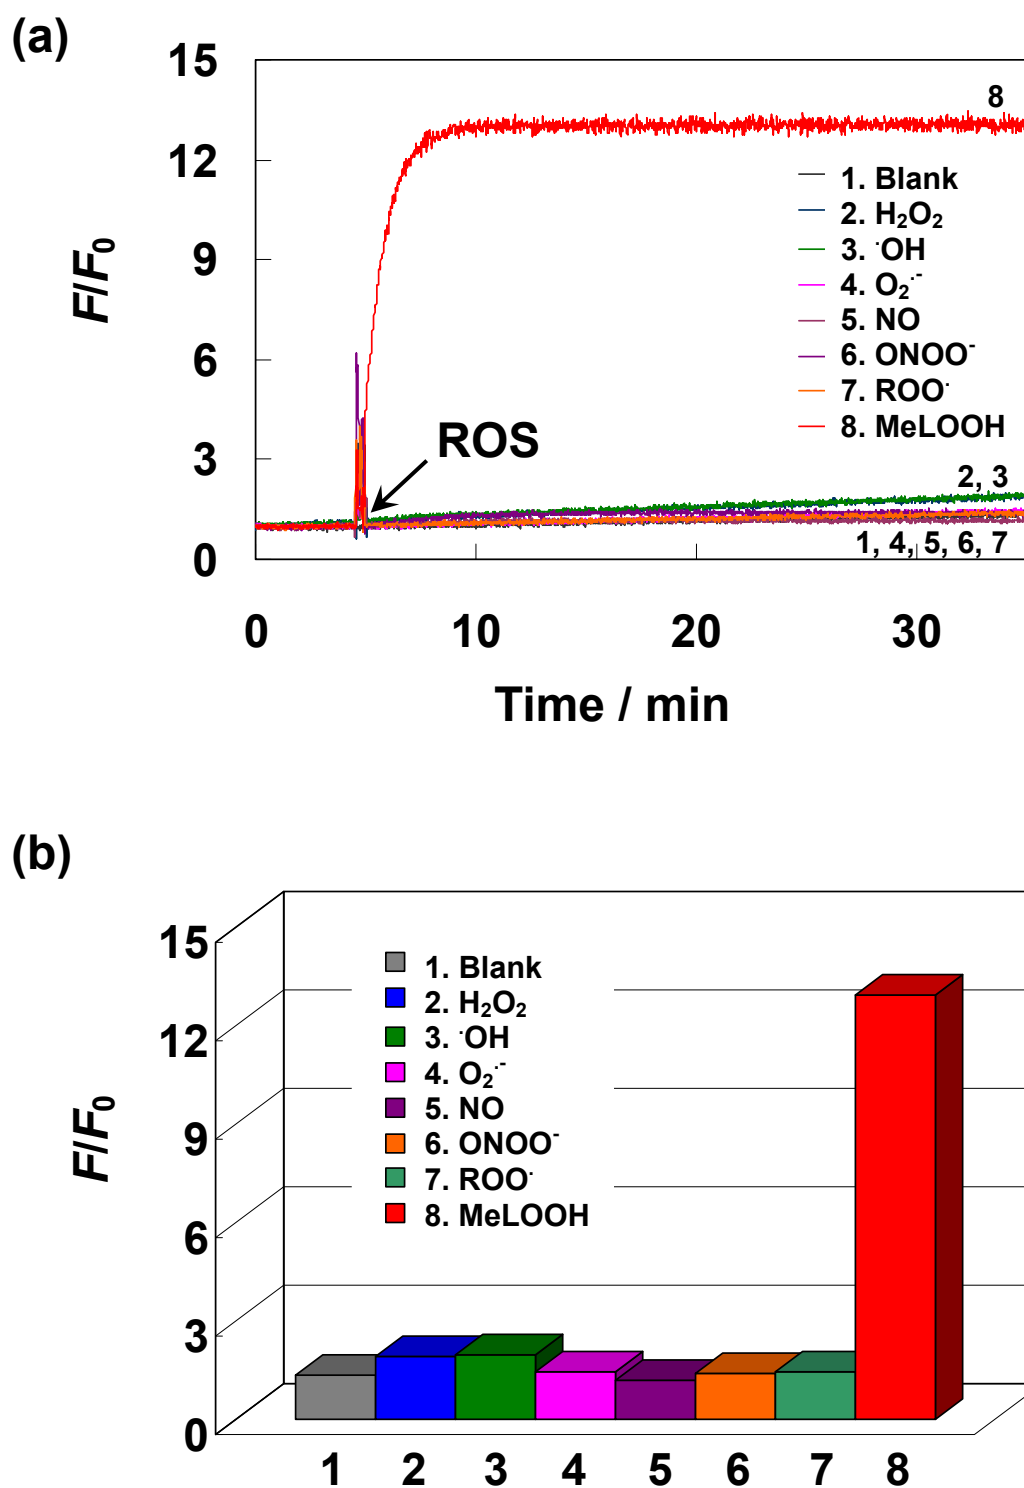

Fig. S2 The colour versions of the Fig. 4.

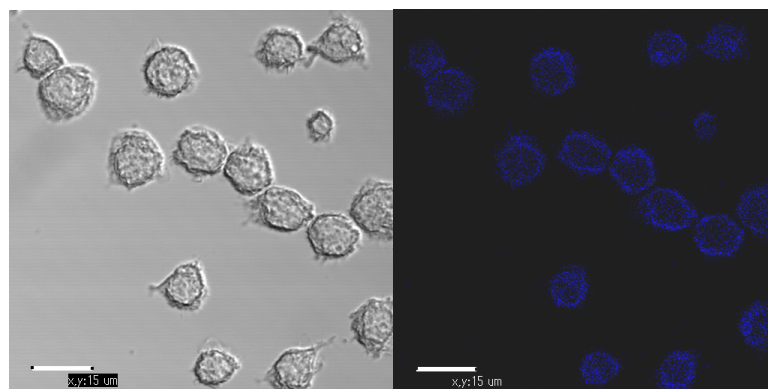

**Fig. S3** Phase contrasts and fluorescence images of DPPP=O in live J774A.1 cells. Scale bar indicates 15  $\mu\text{m}$ .
